# Supplementary material
Source: ML conference proceedings conference paper supplement (https://proceedings.mlr.press/v51/rockova16.html)
Supplement: Supplementary file 1 [file rockova16-supp.pdf]

# Determinantal Regularization for Ensemble Variable Selection

Supplementary Material

In the following theorem, we derive the form of the Hessian matrix  $\mathbf{H}_k$  which first appears in equation (8) of the main paper.

**Theorem 1.** *The Hessian  $\mathbf{H}_k$  of  $\log \pi(\mathbf{Y}, \boldsymbol{\beta})$  has the following form*

$$\mathbf{H}_k = -[\mathbf{X}'\mathbf{X} + \mathbf{D}^*(\boldsymbol{\beta})] - 2 \left( \frac{1}{v_1} - \frac{1}{v_0} \right) \text{diag} \left\{ \beta_i \frac{\partial p^*(\beta_i)}{\partial \beta_i} \right\}_{i=1}^p - \frac{1}{2} \left( \frac{1}{v_1} - \frac{1}{v_0} \right) \text{diag} \left\{ \beta_i^2 \frac{\partial^2 p^*(\beta_i)}{\partial \beta_i^2} \right\}_{i=1}^p. \quad (0.1)$$

where  $\mathbf{D}^*(\boldsymbol{\beta}) = \text{diag} \{d^*(\beta_i)\}_{i=1}^p$  with

$$d^*(\beta_i) = \frac{1}{v_1} p^*(\beta_i) + \frac{1}{v_0} [1 - p^*(\beta_i)]$$

and  $p^*(\beta_i) = \mathbf{P}(\gamma_i = 1 | \beta_i, \theta)$ .

*Proof.* To begin, we have

$$\begin{aligned} \frac{\partial}{\partial \boldsymbol{\beta}} \log \pi(\mathbf{Y}, \boldsymbol{\beta}) &= \frac{\partial}{\partial \boldsymbol{\beta}} \log \left( \sum_{\boldsymbol{\gamma}} \pi(\mathbf{Y}, \boldsymbol{\beta} | \boldsymbol{\gamma}) \pi(\boldsymbol{\gamma}) \right) \\ &= \frac{1}{\pi(\mathbf{Y}, \boldsymbol{\beta})} \sum_{\boldsymbol{\gamma}} \frac{\partial}{\partial \boldsymbol{\beta}} \pi(\mathbf{Y}, \boldsymbol{\beta} | \boldsymbol{\gamma}) \pi(\boldsymbol{\gamma}) = \sum_{\boldsymbol{\gamma}} \frac{\partial}{\partial \boldsymbol{\beta}} \log \pi(\mathbf{Y}, \boldsymbol{\beta} | \boldsymbol{\gamma}) \pi(\boldsymbol{\gamma} | \mathbf{Y}, \boldsymbol{\beta}) \\ &= \frac{\partial}{\partial \boldsymbol{\beta}} \left\{ -\frac{1}{2} (\mathbf{Y}'\mathbf{Y} - 2\boldsymbol{\beta}'\mathbf{X}'\mathbf{Y} + \boldsymbol{\beta}'\mathbf{X}'\mathbf{X}\boldsymbol{\beta}) - \frac{1}{2} \boldsymbol{\beta}'\mathbf{D}(\boldsymbol{\beta})\boldsymbol{\beta} \right\} \\ &= \mathbf{X}\mathbf{Y} - [\mathbf{X}'\mathbf{X} + \mathbf{D}(\boldsymbol{\beta})]\boldsymbol{\beta} - \frac{1}{2} \left( \frac{1}{v_1} - \frac{1}{v_0} \right) \text{vec} \left\{ \beta_i^2 \frac{\partial p^*(\beta_i)}{\partial \beta_i} \right\}_{i=1}^p. \end{aligned}$$

$$\frac{\partial^2}{\partial \boldsymbol{\beta} \boldsymbol{\beta}'} \log \pi(\mathbf{Y}, \boldsymbol{\beta}) = -[\mathbf{X}'\mathbf{X} + \mathbf{D}(\boldsymbol{\beta})] - 2 \left( \frac{1}{v_1} - \frac{1}{v_0} \right) \text{diag} \left\{ \beta_i \frac{\partial p^*(\beta_i)}{\partial \beta_i} \right\}_{i=1}^p \quad (0.2)$$

$$- \frac{1}{2} \left( \frac{1}{v_1} - \frac{1}{v_0} \right) \text{diag} \left\{ \beta_i^2 \frac{\partial^2 p^*(\beta_i)}{\partial \beta_i^2} \right\}_{i=1}^p \quad (0.3)$$
